# Supplementary material
Source: PubMed Central journal article supplement (PMC3212032)
Supplement: NIHMS333259-supplement-6_si_006.pdf [file NIHMS333259-supplement-6_si_006.pdf]

## Supporting Information Figure S6

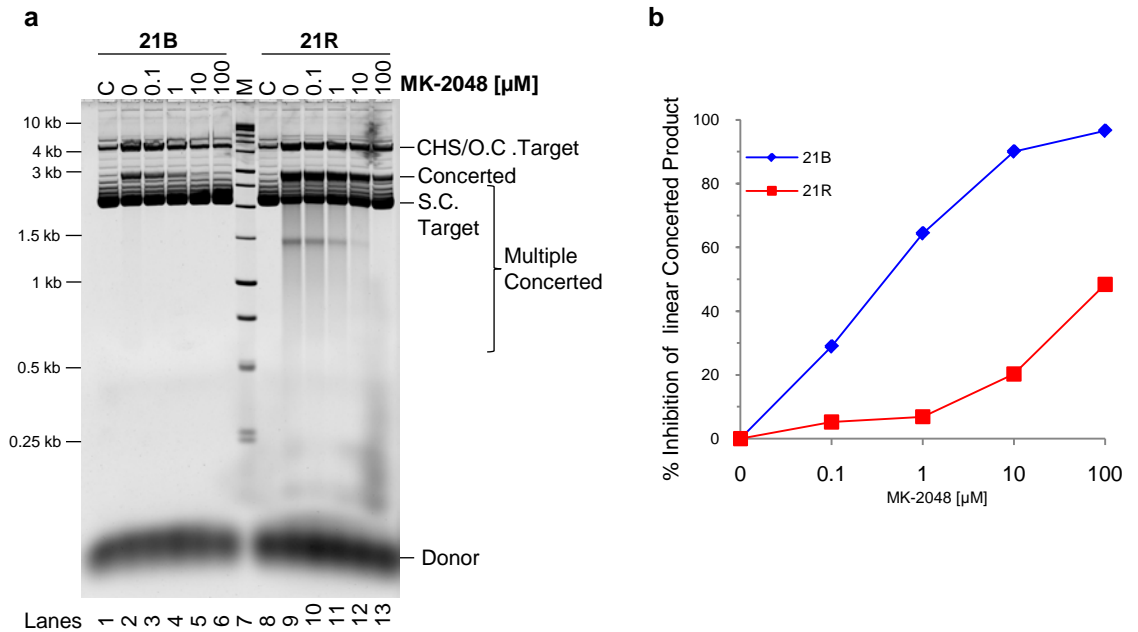

Supporting Information Figure S6. Concerted integration activity by HIV IN with ODN substrates is sensitive to strand transfer inhibitors. (a) IN ( $0.5 \mu\text{M}$  as dimers) was preincubated with 21B and 21R ( $0.6 \mu\text{M}$ ) for 15 min at  $14^\circ\text{C}$ . Varying concentrations of MK-2048 ( $0.1 \mu\text{M}$  to  $100 \mu\text{M}$ , indicated on top) and supercoiled target DNA ( $10 \text{ nM}$ ) were added. Strand transfer was for 1 h at  $37^\circ\text{C}$ . Reactions were stopped with  $25 \text{ mM}$  EDTA and deproteinized samples were separated on a  $1.8\%$  agarose gel. Products were identified by staining with SYBR Gold and scanning on Typhoon Trio Variable Imager. Lane 7 contained a  $1 \text{ kb}$  DNA ladder molecular size marker. (b) The linear concerted and CHS integration products were quantified by determining the pixels in each product and subtracting the pixels obtained from control reactions (lanes 1 and 8, marked C) performed without IN. Inhibition of concerted integration products was quantified by comparison to lanes 2 or 9 (left panel) in which no inhibitor was added. The multiple concerted integration products were not calculated.
